# Supplementary material for: Tandem chimeric antigen receptor (CAR) T cells targeting EGFRvIII and IL-13Rα2 are effective against heterogeneous glioblastoma
Source: PubMed Central journal article supplement — Neurooncol Adv. 2022 Dec 22;5(1):vdac185. doi: 10.1093/noajnl/vdac185 (PMC9896600; doi:10.1093/noajnl/vdac185), 2022-12-22

# SUPPLEMENTARY FIGURE 1

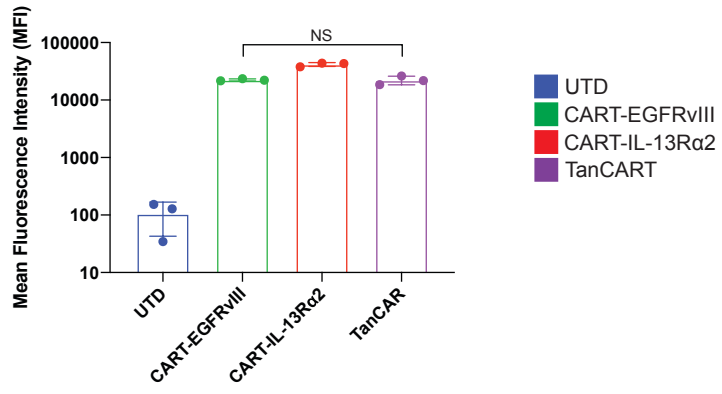

# SUPPLEMENTARY FIGURE 2

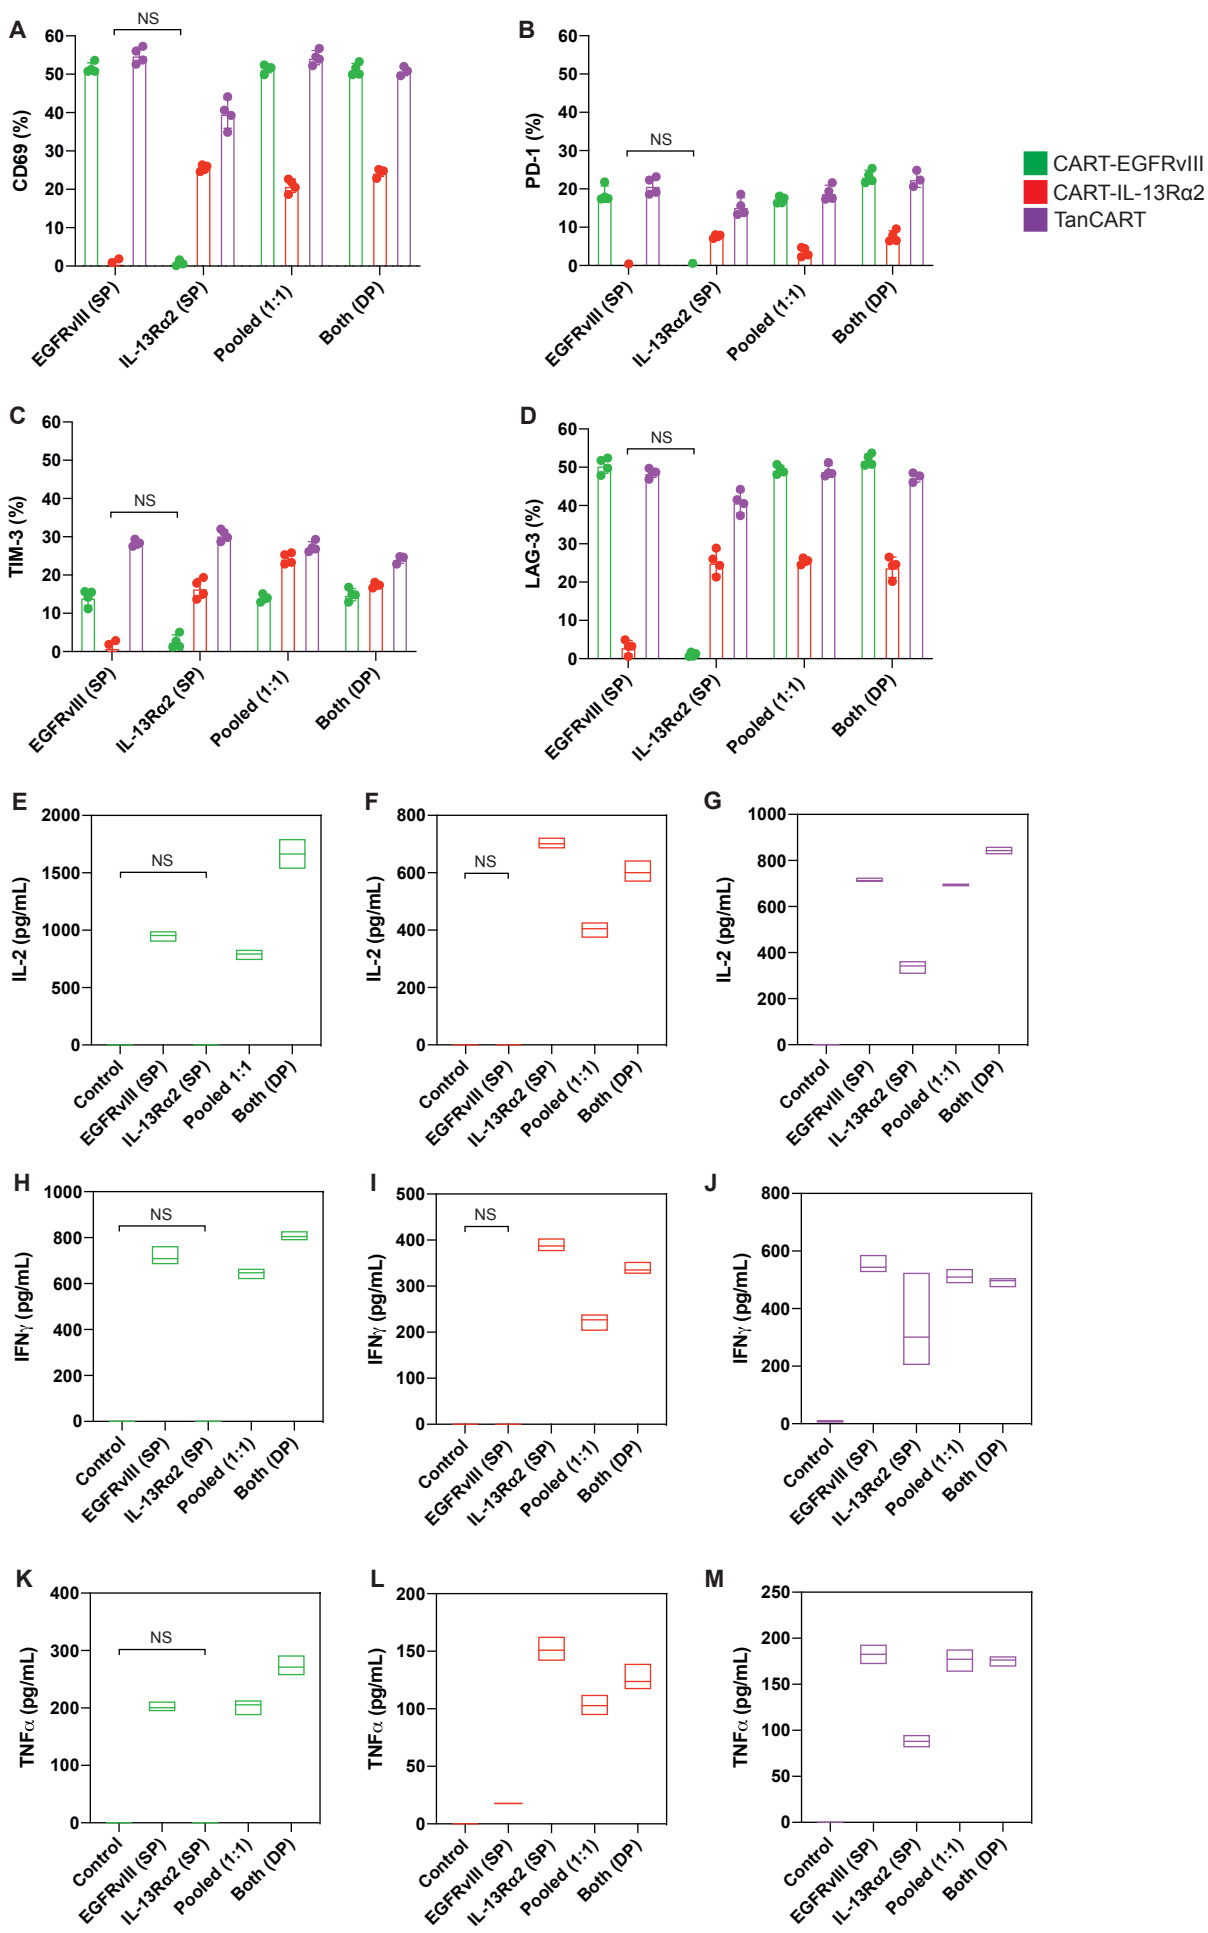

### SUPPLEMENTARY FIGURE 3

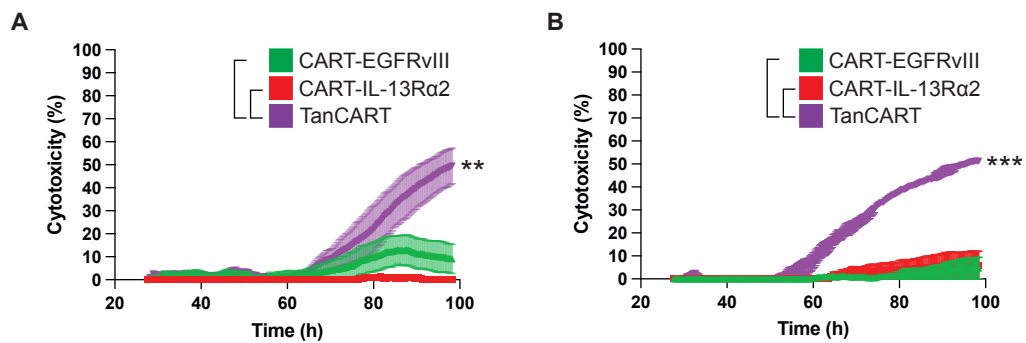

# SUPPLEMENTARY FIGURE 4

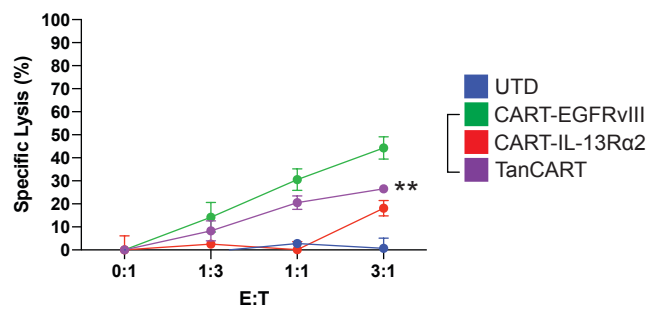

# SUPPLEMENTARY FIGURE 5

**A** Untreated Tumor (EGFRvIII)

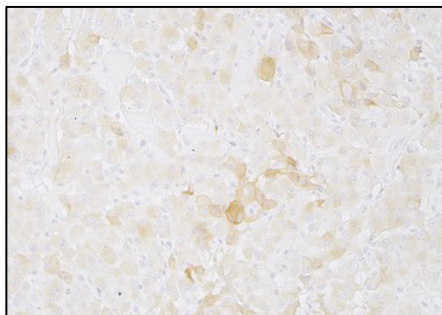

**B** Untreated Tumor (IL-13R $\alpha$ 2)

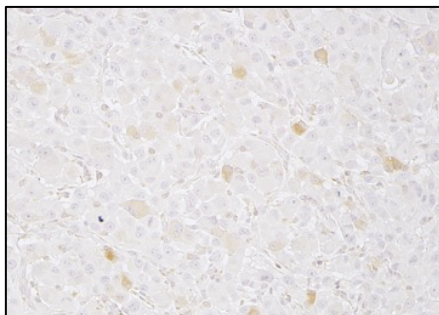

**C** Post-CART-EGFRvIII (EGFRvIII)

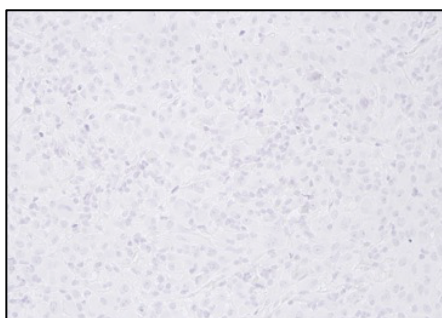

**D** Post-CART-EGFRvIII (IL-13R $\alpha$ 2)

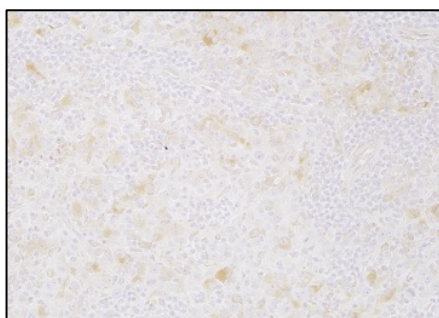

**E** BT74 Untreated (EGFRvIII)

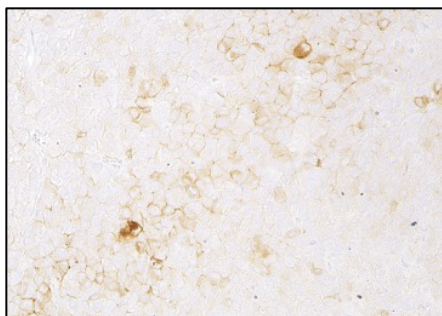

**F** BT74 Untreated (IL-13R $\alpha$ 2)

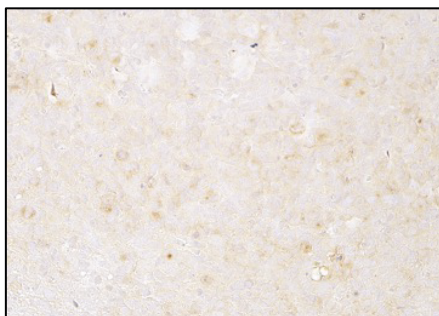

Supplement: vdac185_suppl_supplementary_figures.pdf [file vdac185_suppl_supplementary_figures.pdf]
